# Supplementary material
Source: ML conference proceedings conference paper supplement (https://openaccess.thecvf.com/content/CVPR_2020/html/Manivasagam_LiDARsim_Realistic_LiDAR_CVPR_2020_paper.html)
Supplement: Supplementary file 1 [file Manivasagam_LiDARsim_Realistic_LiDAR_CVPR_2020_supplemental.zip]

Archive with 4 entries (4 files):
- submission612.mp4
- __MACOSX/._submission612.mp4
- 00612-supp.pdf
- __MACOSX/._00612-supp.pdf
